# Supplementary material
Source: publisher figshare collection journal article supplement (https://acs.figshare.com/ndownloader/files/13747541)
Supplement: Supplementary file 1 [file 13747541]

## SUPPORTING INFORMATION

### Inhibition of PCSK9<sup>D374Y</sup>/LDLR Protein-Protein Interaction by Computationally Designed T9 Lupin Peptide Analogs

*Carmen Lammi, Jacopo Sgrignani,<sup>b</sup> Gabriella Roda,<sup>a</sup> Anna Arnoldi,<sup>a</sup> Giovanni Grazioso<sup>\*,a</sup>*

<sup>a</sup> Dipartimento di Scienze Farmaceutiche, Università degli Studi di Milano, Via L. Mangiagalli 25, 20133 Milan, Italy.

<sup>b</sup> Istituto di Ricerca in Biomedicina (IRB), Università della Svizzera Italiana (USI), Via V. Vela 6, CH-6500, Bellinzona, Switzerland.

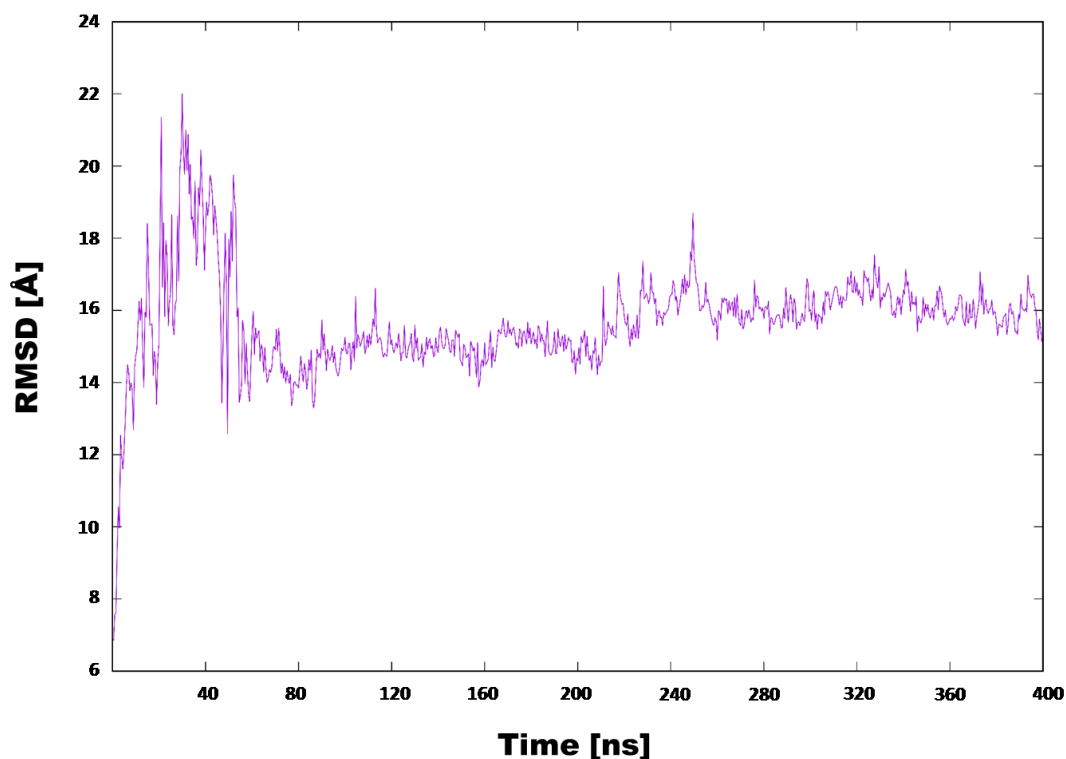

**Figure S1.** Distance between the T9 center of mass and the Ca atoms of F379-, R192- and Y374-PCSK9<sup>D374Y</sup> residues.

**Table S1.** Contact analysis performed on the 400 ns-long MD simulations of PCSK9<sup>D374Y</sup>/T9 complex. Only residues with a contact frequency  $\geq 70$  % (i.e. the ligand is in contact with the residue in more than the 70 of the analyzed frames) are reported. To run the analysis, the system was divided in two groups of atoms (enzyme and peptide) and the minimum contact distance was set to 0.4 nm. The analysis was carried out by *g\_contacts* algorithm, written by Blau and Grubmuller.<sup>1</sup>

| PCSK9 <sup>D374Y</sup> residue | T9 residue | Percentage of contact |
|--------------------------------|------------|-----------------------|
| Y374                           | I12        | 100                   |
| V380                           | I12        | 96                    |
| Q382                           | R14        | 96                    |
| S372                           | I12        | 95                    |
| V380                           | I12        | 90                    |
| S381                           | R14        | 89                    |
| C378                           | I12        | 89                    |
| Y374                           | V11        | 88                    |
| F379                           | I12        | 87                    |
| C385                           | H6         | 84                    |
| Y374                           | H6         | 83                    |
| Y374                           | G10        | 81                    |
| Y374                           | Q7         | 81                    |
| C385                           | S5         | 81                    |
| Y374                           | V13        | 80                    |
| K222                           | Q7         | 79                    |
| S376                           | S5         | 78                    |
| Y374                           | E9         | 78                    |
| C385                           | Q7         | 75                    |
| S221                           | V13        | 73                    |

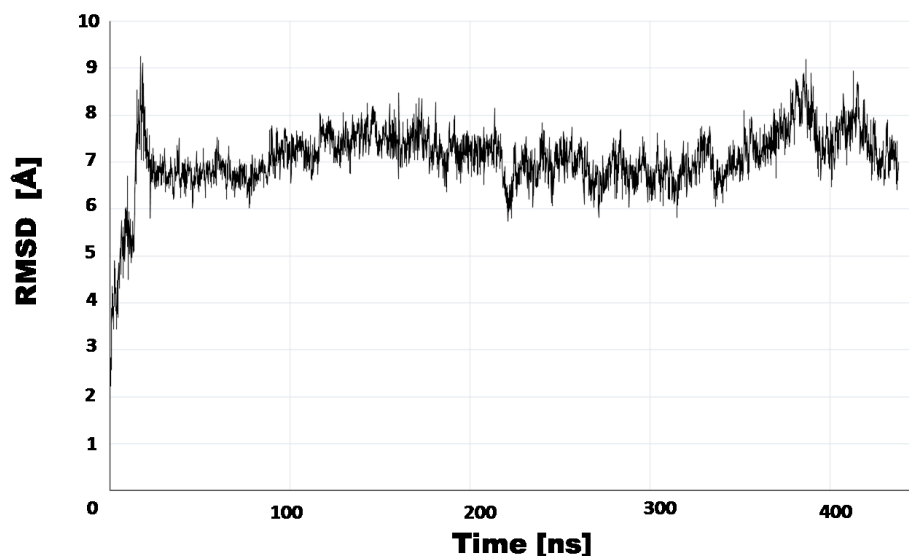

**Figure S2.** The RMSD of T9D8A\_1 C $\alpha$  atoms, over more than 400 ns of MD simulations, is shown with respect to the initial minimized structure of PCSK9<sup>D374Y</sup>/T9D8A\_1 complex.

## ADDITIONAL DETAILS ON EXPERIMENTAL PROCEDURES

**Chemicals.** The CircuLex recombinant PCSK9<sup>D374Y</sup> and the *in vitro* PCSK9<sup>D374Y</sup>-LDLR binding Assay Kit were bought from CycLex Co. (Nagano, Japan). Dulbecco's modified Eagle's medium (DMEM), fetal bovine serum (FBS), stable L-glutamine, penicillin/streptomycin, phosphate buffered saline (PBS), chemiluminescent reagent, and 96-well plates were purchased from Euroclone (Milan, Italy). The antibody against LDLR and the TMB substrate were bought from Pierce (Rockford, IL, USA). Janus Green B, bovine serum albumin (BSA), formaldehyde, HCl and H<sub>2</sub>SO<sub>4</sub> were from Sigma-Aldrich (St. Louis, MO, USA). The LDL-DyLight<sup>TM</sup> 550 was from Cayman Chemical (Ann Arbor, MI, USA). The synthetic peptides T9D8A\_1 was synthesized by the company GeneScript (Piscataway, NJ, USA) at >95% purity.

**PCSK9<sup>D374Y</sup>-LDLR PPI evaluation.** Peptides T9D8A and T9D8A\_1 (0.1  $\mu$ M - 1.0 mM) was investigated using the *in vitro* PCSK9-LDLR binding assay from CircuLex, following the manufacturer instructions after small modification of the conditions previously described.<sup>19</sup> Briefly, peptide T9D8A\_1 was tested in presence of purified recombinant PCSK9<sup>D374Y</sup>. For the *in vitro* screening of the PCSK9<sup>D374Y</sup>-LDLR PPI inhibition, T9D8A\_1 was added at different concentrations, ranging from 0.1  $\mu$ M to 1.0 mM, to the His-tagged PCSK9<sup>D374Y</sup> in the wells that had been coated with recombinant LDLR-AB domain. Then, the evaluation of inhibitory effects on PCSK9-LDLR PPI was carried out through the measurement of the amount of His-tagged PCSK9<sup>D374Y</sup> on the wells which is correlated to the absorbance signals at 450 nm was read using the Synergy H1.

**Fluorescent LDL uptake cell-based assay.** A total of 3 x 10<sup>4</sup> HepG2 cells/well were seeded in black 96-well plates with clear bottom and kept in complete growth medium for 2 days before treatment. The following day after 2 h treatment with 4.0  $\mu$ g/mL PCSK9<sup>D374Y</sup> or PCSK9<sup>D374Y</sup> 10.0  $\mu$ M T9D8A\_1

in presence of PCSK9D374Y (4.0 µg/mL), and vehicle (H<sub>2</sub>O) at 37 °C under 5% CO<sub>2</sub> atmosphere, the fluorescent LDL uptake cell-based assay was carried out using the procedure previously reported.<sup>5</sup>

## References

1. Blau, C., and Grubmuller, H. (2013) g\_contacts: Fast contact search in bio-molecular ensemble data. *Comp. Physics Commun.* **2013**, 184, 2856-2859
